# Supplementary material for: Customized Information and Communication Technology for Reducing Social Isolation and Loneliness Among Older Adults: Scoping Review
Source: PubMed Central journal article supplement (PMC8938833; doi:10.2196/34221), 2022-03-07
Supplement: mental_v9i3e34221_app1.pdf [file mental_v9i3e34221_app1.pdf]

Multimedia Appendix 1

Details of included studies (n=39).

| Source                     | Problem discussed in the study  | Purpose of intended solution                              | Type of technology                                                   | Devices                                                               | country of study      |
|----------------------------|---------------------------------|-----------------------------------------------------------|----------------------------------------------------------------------|-----------------------------------------------------------------------|-----------------------|
| Achilleos et al. (2013)    | Social isolation                | increase social communication and social participation    | virtual spaces or classrooms with messaging capabilities, video chat | created a customised device with 2 Mac mini, 2 cameras and microphone | did not mention       |
| Alaoui & Lewkowicz (2013)  | Social isolation                | increase social communication and social participation    | Social network                                                       | TV, Tablet                                                            | France                |
| Angelini et al. (2016)     | Social isolation                | increase social communication                             | Video chat                                                           | Glass window with a TV screen camera and microphone                   | Switzerland           |
| Báez et al. (2016)         | Social isolation                | increase social participation and social communication    | virtual spaces or classrooms with messaging capabilities, video chat | Tablet and necklace sensor                                            | Italy                 |
| Boyd et al. (2015)         | Social isolation                | increase social communication                             | Social network                                                       | Tablet                                                                | UK                    |
| Brandenburgh et al. (2014) | Loneliness                      | increase social communication – para social relationships | Virtual coaching                                                     | Tablet, Desktop, Sensor                                               | Netherland            |
| Buhr et al. (2017)         | Social isolation                | increase social participation                             | Social network                                                       | Tablet (iPad)                                                         | USA                   |
| Caroux et al. (2017)       | Social isolation                | increase social communication                             | Messaging services (Email)                                           | Tablet                                                                | did not mention       |
| Casey et al. (2020)        | Social isolation and Loneliness | increase social participation and social communication    | Robotics                                                             | Robot                                                                 | UK, Italy and Ireland |
| Coelho et al. (2017)       | Social isolation                | increase social communication                             | Social network                                                       | TV, Kinect camera, Desktop, and remote control                        | Portugal              |
| Correia et al. (2016)      | Social isolation                | increase social participation                             | Games                                                                | Robot                                                                 | Portugal              |

|                               |                                 |                                                        |                                                                      |                                                                                                                  |                 |
|-------------------------------|---------------------------------|--------------------------------------------------------|----------------------------------------------------------------------|------------------------------------------------------------------------------------------------------------------|-----------------|
| Czaja et al. (2018)           | Social isolation and Loneliness | increase social participation and social communication | virtual spaces or classrooms with messaging capabilities, Games      | Desktop                                                                                                          | USA             |
| Doppler et al.(2018)          | Social isolation                | increase social participation and communication        | Games, Video chat                                                    | TV, Tablet                                                                                                       | Austria         |
| Fields et al. (2019)          | Loneliness                      | increase social participation                          | Robotics                                                             | Robot                                                                                                            | USA             |
| Gao et al. (2015)             | Loneliness                      | increase social participation                          | Social network                                                       | Touch screen phone                                                                                               | China           |
| Garattini et al.(2012)        | Social isolation and Loneliness | increase social communication                          | Messaging service (broadcast, text, group chat)                      | touch screen computer in a custom-made stand connected with a phone handset with functioning cradle and speakers | Ireland         |
| Gomes et al. (2014)           | Social isolation                | increase social communication                          | Social network                                                       | Tablet                                                                                                           | did not mention |
| Goumopoul oset al. (2017)     | Social isolation and Loneliness | increase social communication and participation        | Social network                                                       | Desktop, Tablet                                                                                                  | Greece          |
| Isaacson et al.(2019)         | Social isolation and Loneliness | increase social participation and social communication | virtual spaces or classrooms with messaging capabilities, video chat | TV, remote and webcam                                                                                            | USA             |
| Jansen-Kosterink et al.(2020) | Social isolation and Loneliness | increase social participation                          | Social network                                                       | can be accessible via smartphone, tablet, and desktop computer                                                   | Netherland      |
| Kleinberger etal. (2019)      | Social isolation                | increase social communication                          | Video chat                                                           | Android device processor turned into a Raspberry- like board                                                     | USA             |
| Koceski & Koceska (2016)      | Social isolation and Loneliness | increase social communication                          | Robotics                                                             | Robot                                                                                                            | Macedonia       |

|                                                  |                                 |                                                          |                                                           |                                  |                 |
|--------------------------------------------------|---------------------------------|----------------------------------------------------------|-----------------------------------------------------------|----------------------------------|-----------------|
| Lee et al. (2015)                                | Social isolation                | increase social participation                            | Social network                                            | Tablet                           | did not mention |
| Machesney, Wexler, Chen, & Coppola, (2014)       | Loneliness                      | companionship - emotional interaction                    | Virtual companion                                         | Tablet                           | USA             |
| Marcelino et al. (2016)                          | Loneliness                      | increase sense of belonging                              | Social network                                            | Desktop computer                 | Portugal        |
| Morganti et al. (2016)                           | Loneliness                      | increase sense of belonging                              | Content creation and Management system                    | Desktop                          | Italy           |
| Muñoz et al. (2015)                              | Social isolation                | increase social communication                            | Social network, video chat                                | Tablet                           | did not mention |
| Muuraiskangaset al. (2012)                       | Loneliness                      | increase social communication - parasocial relationships | Virtual coaching                                          | Tablet                           | Netherland      |
| Neves, Franz, Judges, Beermann, & Baecker (2019) | Social isolation and Loneliness | increase social communication                            | Messaging service (Video, Audio, Photo)                   | Tablet (iPad)                    | Canada          |
| Pereira et al. (2015)                            | Social isolation                | increase social communication                            | Video chat                                                | Smart phone                      | Portugal        |
| Restyandito et al. (2020)                        | Loneliness                      | increase social communication                            | Social network                                            | Smart phone                      | Indonesia       |
| Romanyk et al. (2015)                            | Social isolation and Loneliness | increase social communication                            | Social network                                            | TV                               | Canada          |
| Scandurra & Sjölander (2013)                     | Social isolation                | increase social communication                            | Messaging service (Video, Audio, Photos, and text), Games | communication device<br>ippi, TV | Sweden          |

|                        |                                 |                                       |                                                     |                                                                                |                 |
|------------------------|---------------------------------|---------------------------------------|-----------------------------------------------------|--------------------------------------------------------------------------------|-----------------|
| Sidner et al. (2018)   | Social isolation and Loneliness | companionship                         | Robotics                                            | Robot, Touch screen computer                                                   | USA             |
| Tapia et al. (2016)    | Social isolation                | increase social communication         | Social network, email                               | smart phone and smart TV                                                       | did not mention |
| Tullius & Dogan(2020)  | Social isolation                | increase sense of belonging           | Content creation and Management system              | platform independent though intended for tablet                                | Germany         |
| Zaine et al. (2019)    | Social isolation                | increase social communication         | Messaging services (Video, Audio, Photos, and text) | Smart phone                                                                    | UK andBrazil    |
| Zhao et al. (2016)     | Social isolation                | increase social communication         | Messaging service (voice message)                   | Tangible interface - Flower vase with microphone, small single-board computers | Hongkong        |
| Zuckerman etal. (2020) | Loneliness                      | increase the feelings of "being seen" | Robotics (Non - Humanoid Robot)                     | Non-Humanoid Robot                                                             | Israel          |
